# Supplementary material
Source: MDPI journal article supplement (https://www.mdpi.com/1999-4907/15/5/854)
Supplement: s1 [file s1]

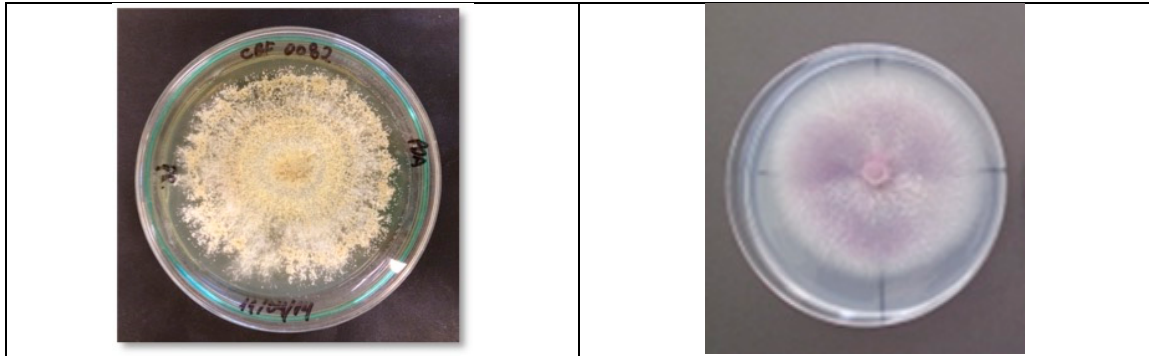

**Supplementary Figure S1.** *Clonostachys rosea* (left) and *Fusarium circinatum* (right) growing on potato-dextrose agar (PDA) petri dishes.
